# Supplementary material for: Protective Effect of Treated Olive Mill Wastewater on Target Bacteria and Mitochondrial Voltage-Dependent Anion-Selective Channel 1
Source: MDPI journal article supplement (doi:10.3390/antiox12020322), 2023-01-30
Supplement: s1 [file s1]

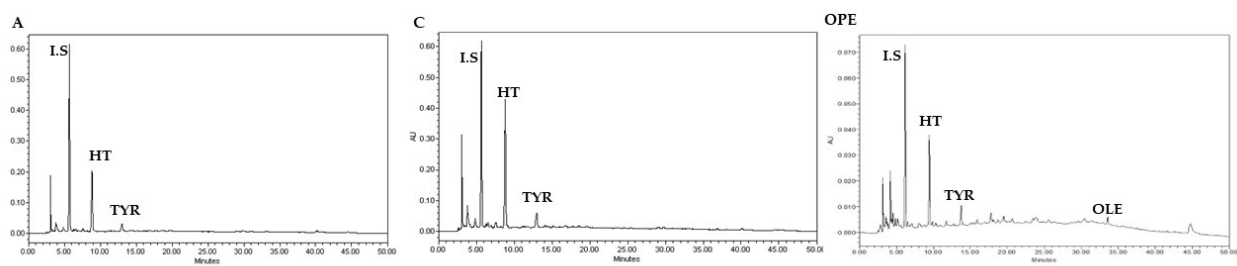

**Figure S1.** HPLC Chromatogram of phenols of A, C and OPE sample detected at 280 nm.

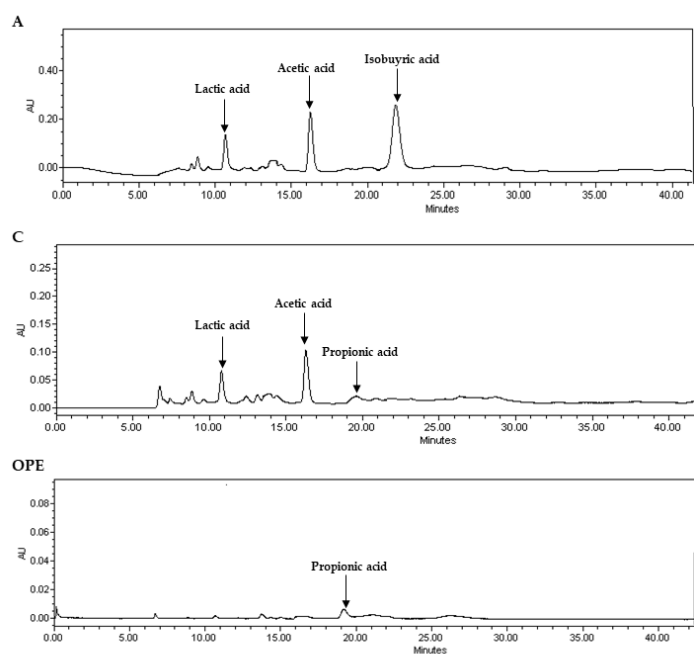

**Figure S2.** HPLC Chromatogram of organic acids of A, C and OPE sample detected at 210 nm.

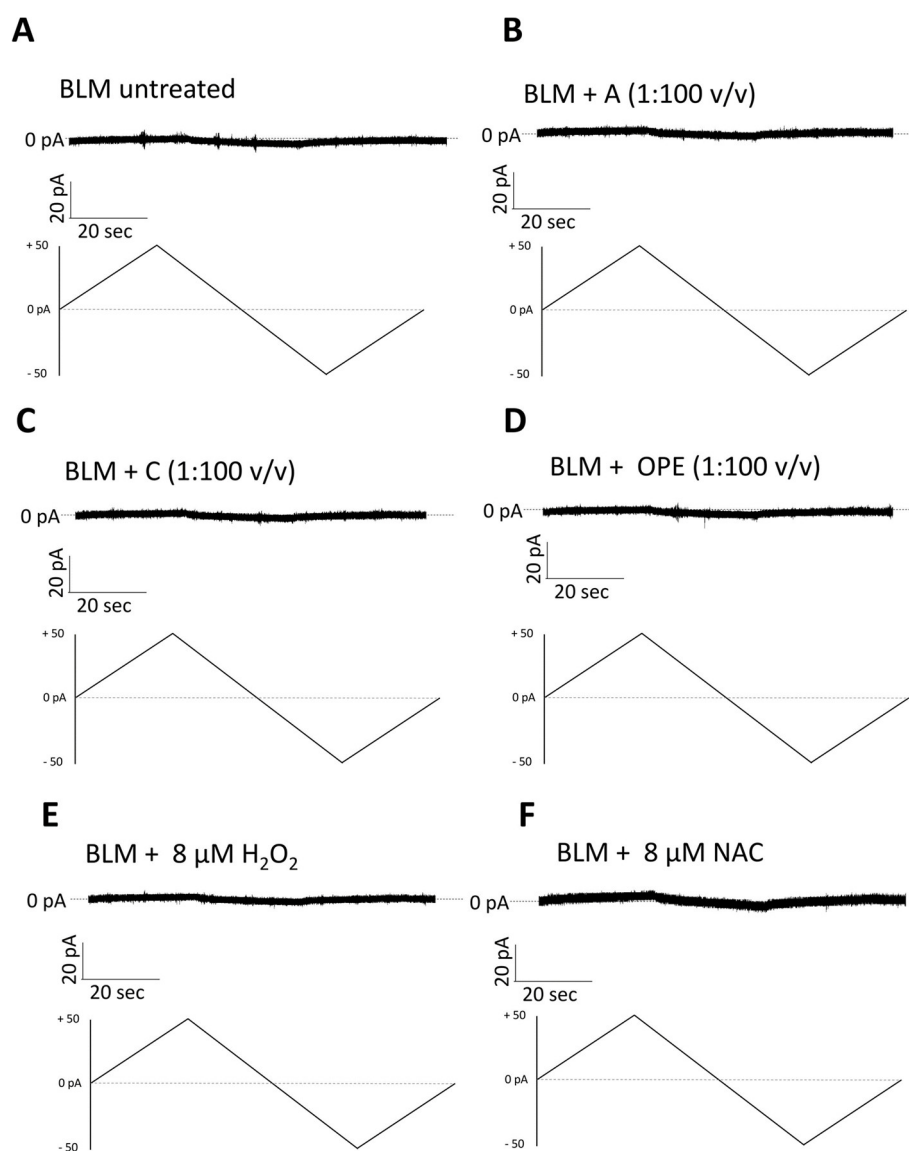

**Figure S3.** Evaluation of the effect of tested samples, hydrogen peroxide and N-acetyl cysteine (NAC) on membrane stability by triangular voltage ramps. Samples A (B), C (C) and OPE (D),  $\text{H}_2\text{O}_2$  (E) and NAC (F) were added to both sides of a DiphPC bilayer at a final concentration of 1:100 (v/v) and 8  $\mu\text{M}$ , respectively, to exclude any interferent effect with the lipid membrane. In each experiment, the stability of the current signal was monitored upon application of a voltage ramp of  $\pm 50$  mV in 1 M KCl and compared to the signal of the bilayer membrane without any addition (A).

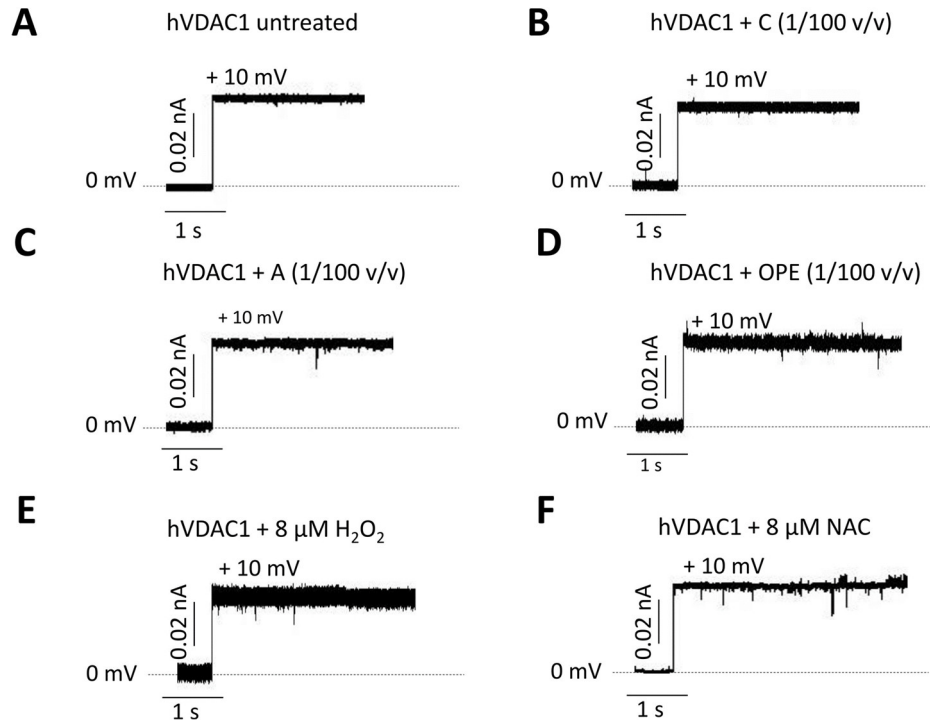

**Figure S4.** Single channel recordings of hVDAC1 in presence of tested samples, hydrogen peroxide and N-acetyl cysteine (NAC). Representative current traces registered upon no addition (A) or addition of samples A (B), C (C), and OPE (D), H<sub>2</sub>O<sub>2</sub> (E) and NAC (F) to both sides of a DiphPC bilayer containing hVDAC1 at a final concentration of 1:100 (v/v) and 8  $\mu$ M respectively. Current measurements were performed in symmetrical 1 M KCl at +10 mV applied.
